# Supplementary material
Source: MDPI journal article supplement (https://www.mdpi.com/2071-1050/14/5/2927)
Supplement: s1 [file s1]

# The Roles of Orbital and Meltwater Climate Forcings on Southern Ocean Dynamics during the Last Deglaciation

Gagan Mandal <sup>1,2,3</sup>, Jia-Yuh Yu <sup>2</sup> and Shih-Yu Lee <sup>3,\*</sup>

<sup>1</sup> Taiwan International Graduate Program, Earth System Science Program, Academia Sinica, Taipei 11529, Taiwan; gagan.iitroorkee@gmail.com

<sup>2</sup> Department of Atmospheric Sciences, National Central University, Taoyuan 32001, Taiwan; jiayuh@atm.ncu.edu.tw

<sup>3</sup> Research Center for Environmental Changes, Academia Sinica, Taipei 11529, Taiwan; shihyu@gate.sinica.edu.tw

\* Correspondence: shihyu@gate.sinica.edu.tw

## 1. Contents of this file

This supporting information file includes two figures ([Figure S1](#) and [Figure S2](#)) and a table ([Table S1](#)).

**Table S1.** The meridional salinity gradient at 14.1 kyr BP in the FULL and the MWF experiments.

| At 14.1 kyr BP  | Salinity Gradient |
|-----------------|-------------------|
| FULL experiment | 0.266             |
| MWF experiment  | −0.009            |

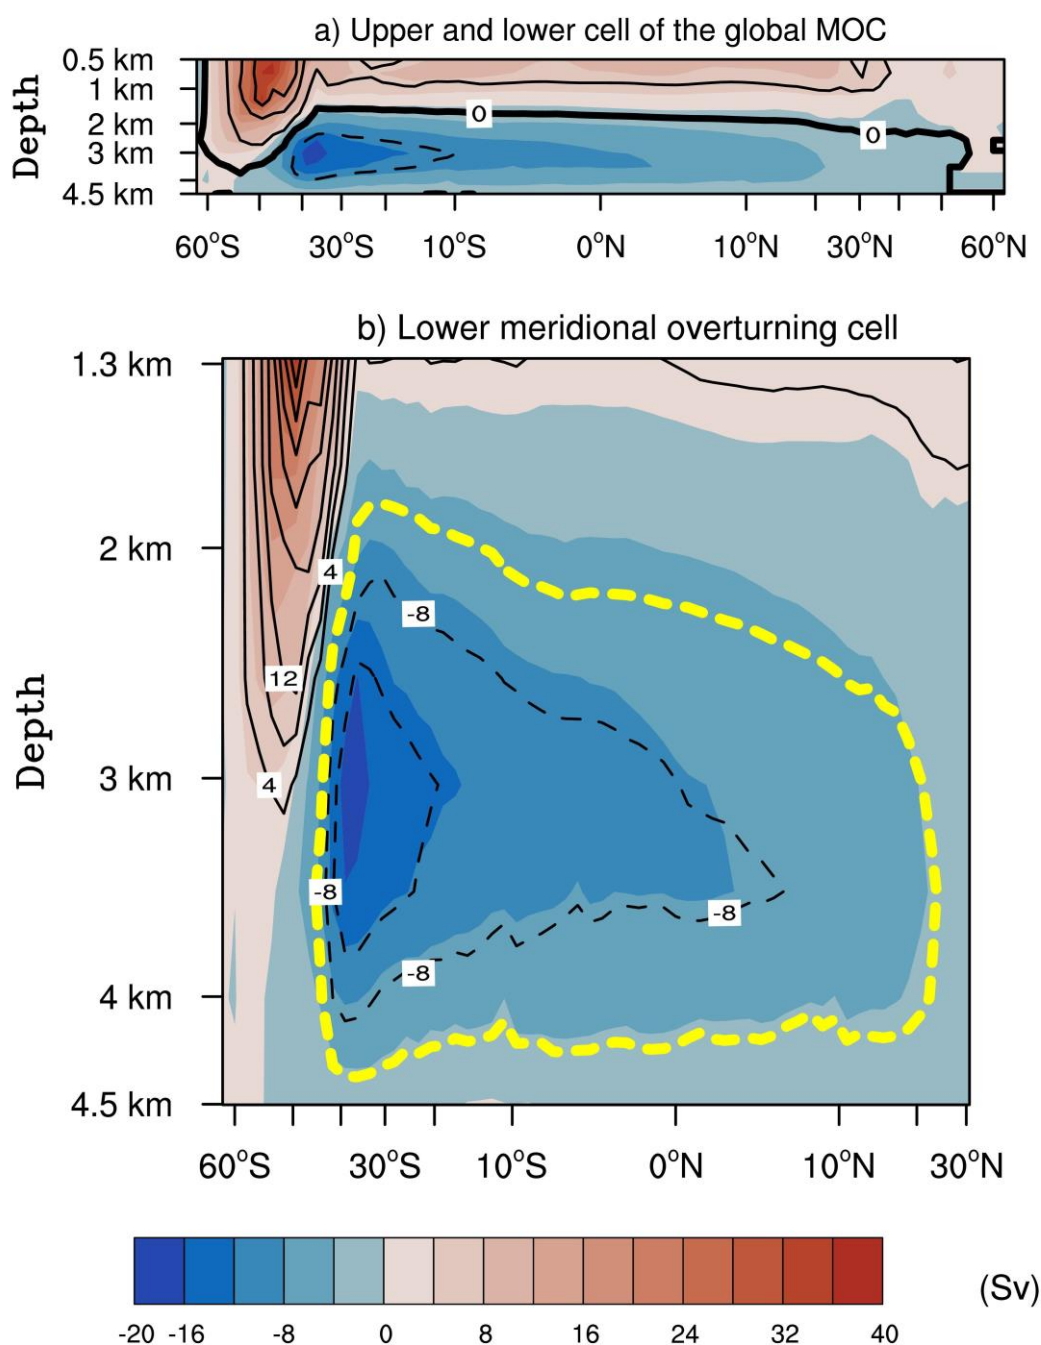

**Figure S1.** The upper and lower meridional overturning cells from the global MOC during the H1 (shaded contour) overlaid by the O<sub>H</sub> (line contour). The units are in Sverdrup (Sv). (a) A segment of the MOC illustrating an upper (red) and a lower (blue) meridional overturning cell along with a Deacon cell (about 45°S to 60°S; red). The shaded contour intervals are 4 Sv, and the line contour intervals are 10 Sv. (b) A detailed outline of the lower section (1.3 to 4.5 km depth) of the MOC from Figure S1a. The shaded and line contour intervals are 4 Sv. The dashed, bold, and yellow contour interval highlighted the extent of the lower meridional overturning cell during the O<sub>H</sub>.

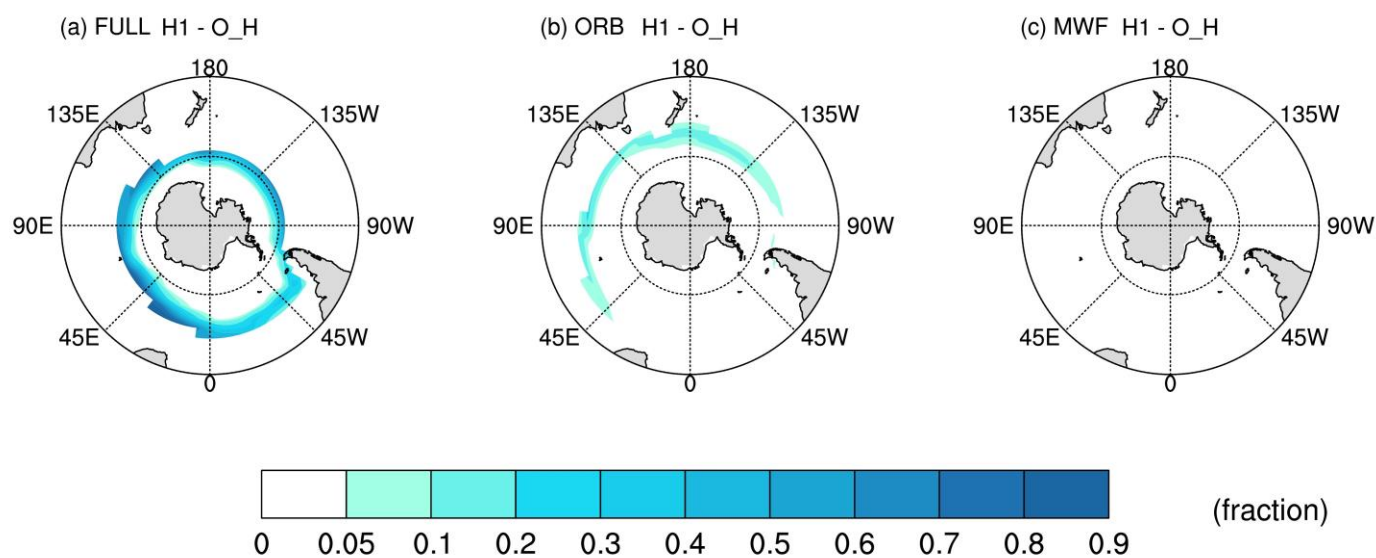

**Figure S2.** The change in Antarctic sea ice distribution between the H1 and the O\_H in (a) the FULL, (b) the ORB, and (c) the MWF experiments during the last deglacial period.
